# Supplementary material for: Extending Janus lectins architecture: Characterization and application to protocells
Source: PubMed Central journal article supplement (PMC9668655; doi:10.1016/j.csbj.2022.11.005), 2022-11-07
Supplement: mmc1.pdf [file mmc1.pdf]

# **Extending Janus lectins architecture, and application for protocell labeling**

Simona Notova <sup>a</sup>, Lina Siukstaite <sup>b,c</sup>, Francesca Rosato <sup>b,c</sup>, Federica Vena <sup>d</sup>, Aymeric Audfray <sup>e</sup>, Nicolai Bovin <sup>f</sup>, Ludovic Landemarre <sup>d</sup>, Winfried Römer <sup>b,c,g</sup>, Anne Imberty <sup>a\*</sup>

MSSVQTAATSWGTVPSIRVYTANNGKITERCWDGKKGWYTGAFNEPGDNVSVTSWL  
 VGSAHIRVYASTGTTTTEWCWDGNGWTKGAYTATN**PNGELLSS**MSLRRGIYHIEN  
 AGVPSAIDLKDGSSSDGTPIVGWQFTPDTINWHQLWLAEPIPNAVDTFTLCNLFSGTY  
 MDLYNGSSEAGTAVNGWQGTAFITNPHQLWTIKKSSDGTSYKIQNYGSKTFVDLVN  
 GDSSDGAKIAGWTGTWDEGNPHQKWYFNRM-

**Supplementary Figure 1: Amino acid sequence of Janus lectin RSL-MOA.** The lectin consists of monomer RSL at the N-terminus (blue) linked through eight AA linker (red) to  $\beta$ -trefoil domain of MOA at C-terminus (green).

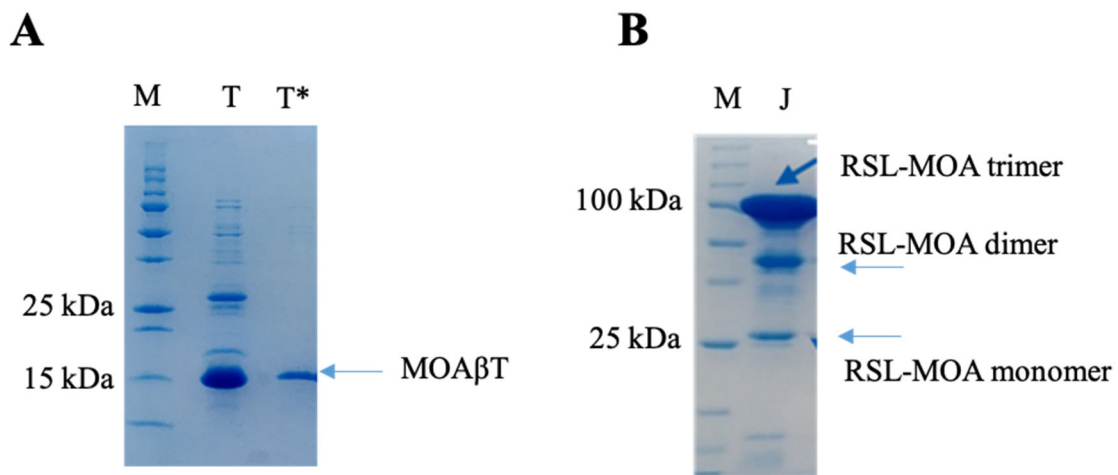

**Supplementary Figure 2: SDS PAGE analysis of MOA $\beta$ T and RSL-MOA.** The protein samples were analyzed under denaturing conditions on 12% polyacrylamide gel. M-protein marker, J-Janus lectin, T- MOA $\beta$ T, T\*- MOA $\beta$ T cleaved by TEV protease. A) MOA $\beta$ T with the estimated size of 17.2 kDa appears as monomeric and the impurities were eliminated during TEV cleavage and subsequent purification of protein. B) Janus lectin RSL-MOA is resistant to denaturation conditions and on the gel appears as a monomer (28 kDa), dimer (56 kDa), and trimer (83 kDa) whereas the trimer is the most abundant.

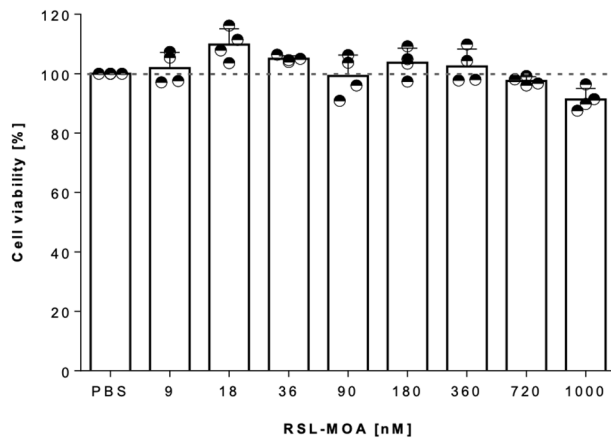

**Supplementary Figure 3: Viability of H1299 cells upon treatment with RSL-MOA.** Evaluation of cell viability and proliferation following the addition of RSL-MOA in a standard cell proliferation assay (MTT) at 24 h post-treatment. The percentage of viability for treated samples is compared to control treatment with PBS. The results indicate that cell viability and proliferation are preserved when RSL-MOA is added to cells in the range 0 – 1  $\mu$ M. Individual values from four independent experiments are shown,  $n = 4$ .
